# Supplementary material for: Evidence-based management approaches for patients with severe chronic obstructive pulmonary disease (COPD): A practice review
Source: PubMed Central journal article supplement (PMC9087316; doi:10.1177/02692163221079697), 2022-03-20
Supplement: sj-pdf-1-pmj-10.1177_02692163221079697.pdf [file sj-pdf-1-pmj-10.1177_02692163221079697.pdf]

## **Supplementary material 1** Search strategies

### PubMed search strategy

(Chronic obstructive pulmonary disease or COPD) [Title/Abstract] AND Guideline [Title/Abstract]

(Multidisciplinary or Assessment) [Title/Abstract] AND (Chronic obstructive pulmonary disease or COPD) [Title/Abstract]

(Beta-agonist or Anticholinergics) [Title/Abstract] AND (Chronic obstructive pulmonary disease or COPD) [Title/Abstract]

(Inhaled corticosteroids or Corticosteroids or Opioids or Antibiotics or Theophylline or Phosphodiesterase-4 or Antidepressants or Benzodiazepines or Mucolytics) [Title/Abstract] AND (Chronic obstructive pulmonary disease or COPD) [Title/Abstract]

(Oxygen therapy or Non-invasive ventilation or Self-management or Pulmonary rehabilitation or Cognitive Behavioural Therapy or Handheld fan or Nutritional support or Telehealth or Relaxation or Breathing exercise) [Title/Abstract] AND (Chronic obstructive pulmonary disease or COPD) [Title/Abstract]

**Supplementary material 2** Selection process of guidelines\_PRISMA flowchart

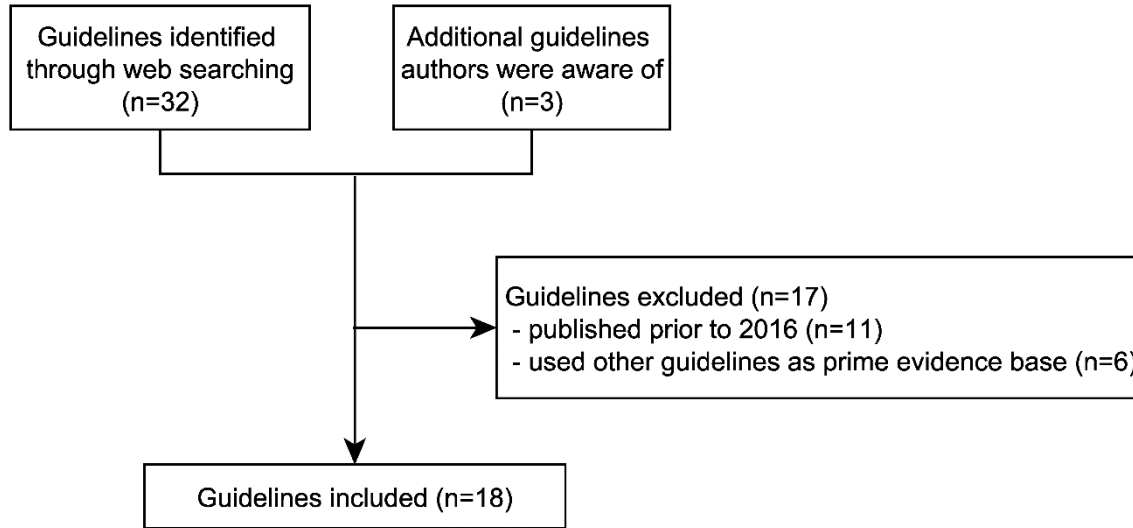

**Supplementary material 3** Evidence used to form practice recommendations

| <b>Authors</b>                                                                                                      | <b>Year</b> | <b>Title</b>                                                                                                                                                                                                    | <b>Source</b>                                                             | <b>Type of evidence</b>                |
|---------------------------------------------------------------------------------------------------------------------|-------------|-----------------------------------------------------------------------------------------------------------------------------------------------------------------------------------------------------------------|---------------------------------------------------------------------------|----------------------------------------|
| <b>Do_ multidisciplinary approach and assessment</b>                                                                |             |                                                                                                                                                                                                                 |                                                                           |                                        |
| Kruis AL, Smidt N, Assendelft WJ, Gussekloo J, Boland MR, Rutten - van Mólken M, Chavannes NH                       | 2013        | Integrated disease management interventions for patients with chronic obstructive pulmonary disease                                                                                                             | Cochrane Database of Systematic Reviews, 2013 (10)                        | Cochrane review                        |
| Brighton LJ, Miller S, Farquhar M, Booth S, Yi D, Gao W, Bajwah S, Man WD, Higginson IJ, Maddocks M                 | 2019        | Holistic services for people with advanced disease and chronic breathlessness: a systematic review and meta-analysis                                                                                            | Thorax 2019; 74(3): 270-281.                                              | Systematic review and meta-analysis    |
| Higginson IJ, Bausewein C, Reilly CC, Gao W, Gysels M, Dzingina M, McCrone P, Booth S, Jolley CJ, Moxham J.         | 2014        | An integrated palliative and respiratory care service for patients with advanced disease and refractory breathlessness: a randomised controlled trial                                                           | The Lancet Respiratory Medicine 2014; 2(12): 979-987                      | Randomised controlled trial            |
| Çolak Y, Nordestgaard BG, Vestbo J, Lange P, Afzal S.                                                               | 2019        | Prognostic significance of chronic respiratory symptoms in individuals with normal spirometry                                                                                                                   | European Respiratory Journal 2019; 54(3): 1900734                         | Population-based cohort study          |
| Cheng S-L, Lin C-H, Wang C-C, Chan M-C, Hsu J-Y, Hang L-W, Perng D-W, Yu C-J, Wang H-C.                             | 2019        | Comparison between COPD Assessment Test (CAT) and modified Medical Research Council (mMRC) dyspnea scores for evaluation of clinical symptoms, comorbidities and medical resources utilization in COPD patients | Journal of the Formosan Medical Association 2019; 118(1, Part 3): 429-435 | Population based cross-sectional study |
| Huang L-H, Chen Y-J.                                                                                                | 2016        | The 6-minute walk test to assess exercise capacity of patients with chronic obstructive pulmonary disease                                                                                                       | European Respiratory Journal 2016; 48(suppl 60): PA1385                   | Systematic review                      |
| Chandra D, Wise RA, Kulkarni HS, Benzo RP, Criner G, Make B, Slivka WA, Ries AL, Reilly JJ, Martinez FJ, Sciruba FC | 2012        | Optimizing the 6-Min Walk Test as a Measure of Exercise Capacity in COPD                                                                                                                                        | CHEST 2012; 142(6): 1545-1552                                             | Cohort study                           |
| Amalakanti S, Pentakota MR.                                                                                         | 2016        | Pulse Oximetry Overestimates Oxygen Saturation in COPD                                                                                                                                                          | Respir Care 2016; 61(4): 423-427.                                         | Cross-sectional observational study    |
| Schmidt SAJ, Johansen MB, Olsen M, Xu X, Parker JM, Molfino NA, Lash TL, Sørensen HT, Christiansen CF.              | 2014        | The impact of exacerbation frequency on mortality following acute exacerbations of COPD: a registry-based cohort study                                                                                          | BMJ Open 214; 4(12): e006720                                              | Registry-based cohort study            |

|                                                                                                                                                                     |                                                                              |                                                                                                                                                                                |                                                                                                                                          |                                                                                 |                                     |
|---------------------------------------------------------------------------------------------------------------------------------------------------------------------|------------------------------------------------------------------------------|--------------------------------------------------------------------------------------------------------------------------------------------------------------------------------|------------------------------------------------------------------------------------------------------------------------------------------|---------------------------------------------------------------------------------|-------------------------------------|
| Chen W, Thomas J, Sadatsafavi M, FitzGerald JM.                                                                                                                     | 2015                                                                         | Risk of cardiovascular comorbidity in patients with chronic obstructive pulmonary disease: a systematic review and meta-analysis                                               | The Lancet Respiratory Medicine 2015; 3(8): 631-639                                                                                      | Systematic review and meta-analysis                                             |                                     |
| Edgar RG, Patel M, Bayliss S, Crossley D, Sapey E, Turner AM.                                                                                                       | 2017                                                                         | Treatment of lung disease in alpha-1 antitrypsin deficiency: a systematic review                                                                                               | International journal of chronic obstructive pulmonary disease 2017; 12: 1295-1308                                                       | Systematic review                                                               |                                     |
| Watz H, Tetzlaff K, Wouters E F. M, Kirsten A, Magnussen H, Rodriguez-Roisin R, Vogelmeier C, Fabbri L M, Chanez P, Dahl R, Disse B, Finnigan H, Calverley P. M. A. | 2016                                                                         | Blood eosinophil count and exacerbations in severe chronic obstructive pulmonary disease after withdrawal of inhaled corticosteroids: a post-hoc analysis of the WISDOM trial. | The Lancet Respiratory Medicine. 2016; 4: 390-8.                                                                                         | Randomized, controlled study                                                    |                                     |
| <b>Do_ pharmacological management</b>                                                                                                                               |                                                                              |                                                                                                                                                                                |                                                                                                                                          |                                                                                 |                                     |
| Beta-agonist                                                                                                                                                        | Geake JB, Dabscheck EJ, Wood - Baker R, Cates CJ.                            | 2015                                                                                                                                                                           | Indacaterol, a once - daily beta2 - agonist, versus twice - daily beta2 - agonists or placebo for chronic obstructive pulmonary disease. | Cochrane Database of Systematic Reviews, 2015(1).                               | Cochrane review                     |
|                                                                                                                                                                     | Kew KM, Mavergames C, Walters JAE.                                           | 2013                                                                                                                                                                           | Long - acting beta2 - agonists for chronic obstructive pulmonary disease.                                                                | Cochrane Database of Systematic Reviews, 2013 (10)                              | Cochrane review                     |
| Anticholinergics                                                                                                                                                    | Karner C, Chong J, Poole P.                                                  | 2014                                                                                                                                                                           | Tiotropium versus placebo for chronic obstructive pulmonary disease.                                                                     | Cochrane Database of Systematic Reviews 2014(7).                                | Cochrane review                     |
|                                                                                                                                                                     | Cheyne L, Irvin - Sellers MJ, White J.                                       | 2015                                                                                                                                                                           | Tiotropium versus ipratropium bromide for chronic obstructive pulmonary disease.                                                         | Cochrane Database of Systematic Reviews 2015(9).                                | Cochrane review                     |
|                                                                                                                                                                     | Koarai A, Sugiura H, Yamada M, Ichikawa T, Fujino N, Kawayama T, Ichinose M. | 2020                                                                                                                                                                           | Treatment with LABA versus LAMA for stable COPD: a systematic review and meta-analysis.                                                  | BMC Pulmonary Medicine 2020; 20(1): 111                                         | Systematic review and meta-analysis |
| SABA/SAMA                                                                                                                                                           | Ferguson GT, Ghafouri M, Dai L, Dunn LJ.                                     | 2013                                                                                                                                                                           | COPD patient satisfaction with ipratropium bromide/albuterol delivered via Respimat: a randomized, controlled study.                     | International journal of chronic obstructive pulmonary disease 2013; 8: 139-150 | Randomized, controlled study        |

|           |                                                                                                |      |                                                                                                                                                                                                                                                             |                                                       |                              |
|-----------|------------------------------------------------------------------------------------------------|------|-------------------------------------------------------------------------------------------------------------------------------------------------------------------------------------------------------------------------------------------------------------|-------------------------------------------------------|------------------------------|
| LABA/LAMA | Donohue JF, Soong W, Wu X, Shrestha P and Lei A.                                               |      | Long-term safety of acclidinium bromide/formoterol fumarate fixed-dose combination: Results of a randomized 1-year trial in patients with COPD.                                                                                                             | Respir Med. 2016; 116: 41-8.                          | Randomized, controlled study |
|           | D'Urzo A, Rennard S, Kerwin E, et al                                                           | 2017 | A randomised double-blind, placebo-controlled, long-term extension study of the efficacy, safety and tolerability of fixed-dose combinations of acclidinium/formoterol or monotherapy in the treatment of chronic obstructive pulmonary disease.            | Respiratory Medicine. 2017; 125: 39-48.               | Randomized, controlled study |
|           | Ferguson GT, Taylor AF, Thach C, et al.                                                        | 2016 | Long-term maintenance bronchodilation with indacaterol/glycopyrrolate versus indacaterol in moderate-to-severe COPD patients: the FLIGHT 3 study.                                                                                                           | Chronic Obstructive Pulmonary Diseases. 2016; 3: 716. | Randomized, controlled study |
|           | Decramer M, Anzueto A, Kerwin E, Kaelin T, Richard N, Crater G, Tabberer M, Harris S, Church A | 2014 | Efficacy and safety of umeclidinium plus vilanterol versus tiotropium, vilanterol, or umeclidinium monotherapies over 24 weeks in patients with chronic obstructive pulmonary disease: results from two multicentre, blinded, randomised controlled trials. | The Lancet Respiratory Medicine. 2014; 2: 472-86.     | Randomized, controlled study |
|           | Farne HA, Cates CJ.                                                                            | 2015 | Long - acting beta2 - agonist in addition to tiotropium versus either tiotropium or long - acting beta2 - agonist alone for chronic obstructive pulmonary disease.                                                                                          | Cochrane Database of Systematic Reviews 2015(10).     | Cochrane review              |
|           | Oba Y, Keeney E, Ghatehorde N, Dias S.                                                         | 2018 | Dual combination therapy versus long - acting bronchodilators alone for chronic obstructive pulmonary disease (COPD): a systematic review and network meta - analysis.                                                                                      | Cochrane Database of Systematic Reviews 2018(12).     | Cochrane review              |
|           | van Geffen WH, Carpaij OA, Westbroek LF, Seigers D, Niemeijer A, Vonk JM, Kerstjens HAM..      | 2020 | Long-acting dual bronchodilator therapy (indacaterol/glycopyrronium) versus nebulized short-acting dual bronchodilator (salbutamol/ipratropium) in chronic obstructive pulmonary disease: A double-blind, randomized, placebo-controlled trial              | Respiratory Medicine 2020: 171: 106064.               | Randomised, controlled study |
| ICS/LABA  | Nannini LJ, Poole P, Milan SJ, Kesterton A.                                                    | 2013 | Combined corticosteroid and long - acting beta2 - agonist in one inhaler versus inhaled corticosteroids alone for chronic obstructive pulmonary disease.                                                                                                    | Cochrane Database of Systematic Reviews 2013(8).      | Cochrane review              |

|               |                                                                                                                                                         |      |                                                                                                                                                                                                                                                                     |                                                           |                              |
|---------------|---------------------------------------------------------------------------------------------------------------------------------------------------------|------|---------------------------------------------------------------------------------------------------------------------------------------------------------------------------------------------------------------------------------------------------------------------|-----------------------------------------------------------|------------------------------|
|               | Nannini LJ, Lasserson TJ, Poole P.                                                                                                                      | 2012 | Combined corticosteroid and long - acting beta2 - agonist in one inhaler versus long - acting beta2 - agonists for chronic obstructive pulmonary disease.                                                                                                           | Cochrane Database of Systematic Reviews 2012(9).          | Cochrane review              |
|               | Vestbo J, Leather D, Diar Bakerly N, New J, Gibson JM, McCorkindale S, Collier S, Crawford J, Frith L, Harvey C, Svedsater H, Woodcock A.               | 2016 | Effectiveness of Fluticasone Furoate–Vilanterol for COPD in Clinical Practice.                                                                                                                                                                                      | New England Journal of Medicine 2016: 375(13): 1253-1260  | Randomised, controlled study |
| ICS/LABA/LAMA | Papi, A, Vestbo, J, Fabbri, L, Corradi, M, Prunier, H, Cohuet, G, Guasconi, A, Montagna, I, Vezzoli, S, Petruzzelli, S, Scuri, M, Roche, N, Singh, D.   | 2018 | Papi A, Vestbo J, Fabbri L, et al. Extrafine inhaled triple therapy versus dual bronchodilator therapy in chronic obstructive pulmonary disease (TRIBUTE): a double-blind, parallel group, randomised controlled trial.                                             | Lancet. 2018; 391: 1076-84.                               | Randomised, controlled study |
|               | Rojas - Reyes MX, García Morales OM, Dennis RJ, Karner C.                                                                                               | 2016 | Combination inhaled steroid and long - acting beta2 - agonist in addition to tiotropium versus tiotropium or combination alone for chronic obstructive pulmonary disease.                                                                                           | Cochrane Database of Systematic Reviews 2016(6).          | Cochrane review              |
|               | Ferguson GT, Rabe KF, Martinez FJ, Fabbri LM, Wang C, Ichinose M, Bourne E, Ballal S, Darken P, DeAngelis K, Aurivillius M, Dorinsky P, Reisner C.      | 2018 | Triple therapy with budesonide/glycopyrrolate/formoterol fumarate with co-suspension delivery technology versus dual therapies in chronic obstructive pulmonary disease (KRONOS): a double-blind, parallel-group, multicentre, phase 3 randomised controlled trial. | The Lancet Respiratory Medicine 2018: 6(10): 747-758.     | Randomised, controlled study |
|               | Lipson DA, Barnhart F, Brealey N, Brooks J, Criner GJ, Day NC, Dransfield MT, Halpin DMG, Han MK, Jones CE, Kilbride S, Lange P, Lomas DA, Martinez FJ, | 2018 | Once-Daily Single-Inhaler Triple versus Dual Therapy in Patients with COPD.                                                                                                                                                                                         | New England Journal of Medicine 2018: 378(18): 1671-1680. | Randomised, controlled study |

|                                                 |                                                                                                                                         |      |                                                                                                                                                                                       |                                                                 |                              |
|-------------------------------------------------|-----------------------------------------------------------------------------------------------------------------------------------------|------|---------------------------------------------------------------------------------------------------------------------------------------------------------------------------------------|-----------------------------------------------------------------|------------------------------|
|                                                 | Singh D, Tabberer M, Wise RA, Pascoe SJ.                                                                                                |      |                                                                                                                                                                                       |                                                                 |                              |
| Systemic corticosteroids in acute exacerbations | Walters JAE, Tan DJ, White CJ, Gibson PG, Wood - Baker R, Walters EH.                                                                   | 2014 | Systemic corticosteroids for acute exacerbations of chronic obstructive pulmonary disease.                                                                                            | Cochrane Database of Systematic Reviews 2014(9).                | Cochrane review              |
|                                                 | Sivapalan P, Ingebrigtsen TS, Rasmussen DB, Sørensen R, Rasmussen CM, Jensen CB, Allin KH, Eklöf J, Seersholm N, Vestbo J, Jensen J-US. | 2019 | COPD exacerbations: the impact of long versus short courses of oral corticosteroids on mortality and pneumonia: nationwide data on 67 000 patients with COPD followed for 12 months   | BMJ open respiratory research. 2019; 6: e000407-e               | Observational study          |
| Opioids                                         | Johnson MJ, Currow DC.                                                                                                                  | 2020 | Opioids for breathlessness: a narrative review.                                                                                                                                       | BMJ Supportive & Palliative Care 2020; 10(3): 287-295.          | Narrative review             |
|                                                 | Ekström M, Nilsson F, Abernethy AA, Currow DC.                                                                                          | 2015 | Effects of Opioids on Breathlessness and Exercise Capacity in Chronic Obstructive Pulmonary Disease. A Systematic Review.                                                             | Annals of the American Thoracic Society 2015; 12(7): 1079-1092. | Systematic review            |
|                                                 | Verberkt CA, van den Beuken-van Everdingen MHJ, Schols JMGA, Hameleers N, Wouters EFM, Janssen DJA.                                     | 2020 | Effect of Sustained-Release Morphine for Refractory Breathlessness in Chronic Obstructive Pulmonary Disease on Health Status: A Randomized Clinical Trial.                            | JAMA Internal Medicine 2020; 180(10): 1306-1314.                | Randomised, controlled study |
|                                                 | Currow D, Louw S, McCloud P, Fazekas B, Plummer J, McDonald CF, Agar M, Clark K, McCaffery N, Ekström MP.                               | 2020 | Regular, sustained-release morphine for chronic breathlessness: a multicentre, double-blind, randomised, placebo-controlled trial.                                                    | Thorax 2020; 75(1): 50-56.                                      | Randomised, controlled study |
| Antibiotics                                     | Uzun S, Djamin RS, Kluytmans JA, Mulder PG, van't Veer NE, Ermens AA, Pelle AJ, Hoogsteden                                              | 2014 | Azithromycin maintenance treatment in patients with frequent exacerbations of chronic obstructive pulmonary disease (COLUMBUS): a randomised, double-blind, placebo-controlled trial. | Lancet Respir Med 2014; 2(5): 361-368.                          | Randomised, controlled study |

|         |                                                                                                                                                                                                                                                                                                    |      |                                                                                                                                  |                                                                  |                              |
|---------|----------------------------------------------------------------------------------------------------------------------------------------------------------------------------------------------------------------------------------------------------------------------------------------------------|------|----------------------------------------------------------------------------------------------------------------------------------|------------------------------------------------------------------|------------------------------|
|         | HC, Aerts JG, van der Eerden MM.                                                                                                                                                                                                                                                                   |      |                                                                                                                                  |                                                                  |                              |
|         | Herath SC, Normansell R, Maisey S, Poole P.                                                                                                                                                                                                                                                        | 2018 | Prophylactic antibiotic therapy for chronic obstructive pulmonary disease (COPD).                                                | Cochrane Database of Systematic Reviews 2018(10).                | Cochrane review              |
|         | Albert RK, Connett J, Bailey WC, Casaburi R, Cooper JAD, Criner GJ, Curtis JL, Dransfield MT, Han MK, Lazarus SC, Make B, Marchetti N, Martinez FJ, Madinger NE, McEvoy C, Niewoehner DE, Porsasz J, Price CS, Reilly J, Scanlon PD, Sciruba FC, Scharf SM, Washko GR, Woodruff PG, Anthonisen NR. | 2011 | Azithromycin for Prevention of Exacerbations of COPD.                                                                            | New England Journal of Medicine 2011: 365(8): 689-698.           | Randomised, controlled study |
| Do_LTOT |                                                                                                                                                                                                                                                                                                    |      |                                                                                                                                  |                                                                  |                              |
|         | Gulbas G, Gunen H, In E, Kilic T.                                                                                                                                                                                                                                                                  | 2012 | Long-term follow-up of chronic obstructive pulmonary disease patients on long-term oxygen treatment.                             | International Journal of Clinical Practice 2012: 66(2): 152-157. | Cohort study                 |
|         | Ekström M, Ahmadi Z, Bornefalk - Hermansson A, Abernethy A, Currow D.                                                                                                                                                                                                                              | 2016 | Oxygen for breathlessness in patients with chronic obstructive pulmonary disease who do not qualify for home oxygen therapy.     | Cochrane Database of Systematic Reviews 2016(11).                | Systematic review            |
|         | Turner AM, Sen S, Steeley C, Khan Y, Sweeney P, Richards Y, Mukherjee R.                                                                                                                                                                                                                           | 2014 | Evaluation of oxygen prescription in relation to hospital admission rate in patients with chronic obstructive pulmonary disease. | BMC Pulm Med 2014: 14: 127                                       | Cohort study                 |



|                                                                                                                                                                  |      |                                                                                                                                                                                         |                                                                                     |                                      |
|------------------------------------------------------------------------------------------------------------------------------------------------------------------|------|-----------------------------------------------------------------------------------------------------------------------------------------------------------------------------------------|-------------------------------------------------------------------------------------|--------------------------------------|
| Abernethy AP, McDonald CF, Frith PA, Clark K, Herndon JE, II, Marcello J, Young IH, Bull J, Wilcock A, Booth S, Wheeler JL, Tulsy JA, Crockett AJ, Currow DC.    | 2010 | Effect of palliative oxygen versus room air in relief of breathlessness in patients with refractory dyspnoea: a double-blind, randomised controlled trial.                              | The Lancet 2010: 376(9743): 784-793.                                                | Randomised controlled study          |
| <b>Do_NIV</b>                                                                                                                                                    |      |                                                                                                                                                                                         |                                                                                     |                                      |
| Osadnik CR, Tee VS, Carson - Chahhoud KV, Picot J, Wedzicha JA, Smith BJ.                                                                                        | 2017 | Non - invasive ventilation for the management of acute hypercapnic respiratory failure due to exacerbation of chronic obstructive pulmonary disease.                                    | Cochrane Database of Systematic Reviews 2017(7).                                    | Cochrane review                      |
| Chandra D, Stamm JA, Taylor B, Ramos RM, Satterwhite L, Krishnan JA, Mannino D, Sciruba FC, Holguin F.                                                           | 212  | Outcomes of noninvasive ventilation for acute exacerbations of chronic obstructive pulmonary disease in the United States, 1998-2008.                                                   | Am J Respir Crit Care Med. 2012; 185: 152-9                                         | Cohort study                         |
| Dretzke J, Moore D, Dave C, Mukherjee R, Price MJ, Bayliss S, Wu X, Jordan RE, Turner AM.                                                                        | 2016 | The effect of domiciliary noninvasive ventilation on clinical outcomes in stable and recently hospitalized patients with COPD: a systematic review and meta-analysis.                   | International journal of chronic obstructive pulmonary disease 2016: 11: 2269-2286. | Systematic review and meta-analysis. |
| Bhatt SP, Peterson MW, Wilson JS, Durairaj L.                                                                                                                    | 2013 | Noninvasive positive pressure ventilation in subjects with stable COPD: a randomized trial.                                                                                             | International journal of chronic obstructive pulmonary disease 2013: 8: 581-589.    | Randomised, controlled study         |
| Köhnlein T, Windisch W, Köhler D, Drabik A, Geiseler J, Hartl S, Karg O, Laier-Groeneveld G, Nava S, Schönhofer B, Schucher B, Wegscheider K, Criée CP, Welte T. | 2014 | Non-invasive positive pressure ventilation for the treatment of severe stable chronic obstructive pulmonary disease: a prospective, multicentre, randomised, controlled clinical trial. | The Lancet Respiratory Medicine 2014: 2(9): 698-705                                 | Randomised, controlled study         |
| <b>Do_self-management (moderate)</b>                                                                                                                             |      |                                                                                                                                                                                         |                                                                                     |                                      |
| Zwerink M, Brusse - Keizer M, van der Valk P, Zielhuis GA, Monninkhof EM, van der Palen J, Frith PA, Effing T.                                                   | 2014 | Self management for patients with chronic obstructive pulmonary disease.                                                                                                                | Cochrane Database of Systematic Reviews 2014(3).                                    | Cochrane review                      |
| Lenferink A, Brusse - Keizer M, van der Valk P, Frith PA, Zwerink M, Monninkhof EM, van der Palen J, Effing TW.                                                  | 2017 | Self - management interventions including action plans for exacerbations versus usual care in patients with chronic obstructive pulmonary disease.                                      | Cochrane Database of Systematic Reviews 2017(8).                                    | Cochrane review                      |

|                                                                                                                                   |      |                                                                                                                                                                  |                                                                                   |                                     |
|-----------------------------------------------------------------------------------------------------------------------------------|------|------------------------------------------------------------------------------------------------------------------------------------------------------------------|-----------------------------------------------------------------------------------|-------------------------------------|
| Howcroft M, Walters EH, Wood-Baker R and Walters JA.                                                                              | 2016 | Action plans with brief patient education for exacerbations in chronic obstructive pulmonary disease.                                                            | Cochrane Database of Systematic Reviews. 2016 (12).                               | Cochrane review                     |
| Do_PR                                                                                                                             |      |                                                                                                                                                                  |                                                                                   |                                     |
| McCarthy B, Casey D, Devane D, Murphy K, Murphy E, Lacasse Y.                                                                     | 2015 | Pulmonary rehabilitation for chronic obstructive pulmonary disease.                                                                                              | Cochrane Database of Systematic Reviews 2015(2)                                   | Cochrane review                     |
| Puhan MA, Gimeno - Santos E, Cates CJ, Troosters T.                                                                               | 2016 | Pulmonary rehabilitation following exacerbations of chronic obstructive pulmonary disease.                                                                       | Cochrane Database of Systematic Reviews 2016(12).                                 | Cochrane review                     |
| Holland AE, Mahal A, Hill CJ, Lee AL, Burge AT, Cox NS, Moore R, Nicolson C, O'Halloran P, Lahham A, Gillies R, McDonald CF.      | 2017 | Home-based rehabilitation for COPD using minimal resources: a randomised, controlled equivalence trial.                                                          | Thorax 2017; 72(1): 57-65.                                                        | Randomised, controlled study        |
| Güell M-R, Cejudo P, Ortega F, Puy MC, Rodríguez-Trigo G, Pijoan JI, Martínez-Indart L, Gorostiza A, Bdeir K, Celli B, Galdiz JB. | 2017 | Benefits of Long-Term Pulmonary Rehabilitation Maintenance Program in Patients with Severe Chronic Obstructive Pulmonary Disease. Three-Year Follow-up.          | American Journal of Respiratory and Critical Care Medicine 2017; 195(5): 622-629. | Randomised, controlled study        |
| Do_CBT-based psychological therapies                                                                                              |      |                                                                                                                                                                  |                                                                                   |                                     |
| Pollok J, van Agteren JEM, Esterman AJ, Carson - Chahhoud KV.                                                                     | 2019 | Psychological therapies for the treatment of depression in chronic obstructive pulmonary disease.                                                                | Cochrane Database of Systematic Reviews 2019(3)                                   | Cochrane review                     |
| Zhang X, Yin C, Tian W, Lu D, Yang X.                                                                                             | 2020 | Effects of cognitive behavioral therapy on anxiety and depression in patients with chronic obstructive pulmonary disease: A meta-analysis and systematic review. | The Clinical Respiratory Journal 2020; 14(10): 891-900.                           | Systematic review and meta-analysis |
| Baraniak A, Sheffield D.                                                                                                          | 2011 | The efficacy of psychologically based interventions to improve anxiety, depression and quality of life in COPD: A systematic review and meta-analysis.           | Patient Education and Counseling 2011; 83(1): 29-36                               | Systematic review and meta-analysis |
| Coventry PA, Bower P, Keyworth C, Kenning C, Knopp J, Garrett C, Hind D, Malpass A, Dickens C.                                    | 2013 | The Effect of Complex Interventions on Depression and Anxiety in Chronic Obstructive Pulmonary Disease: Systematic Review and Meta-Analysis.                     | PLOS ONE 2013; 8(4): e60532.                                                      | Systematic review and meta-analysis |

|                                                                                                                                |                                                                                                                             |      |                                                                                                                                                                                                                               |                                                   |                                                                    |
|--------------------------------------------------------------------------------------------------------------------------------|-----------------------------------------------------------------------------------------------------------------------------|------|-------------------------------------------------------------------------------------------------------------------------------------------------------------------------------------------------------------------------------|---------------------------------------------------|--------------------------------------------------------------------|
| Heslop-Marshall K, Baker C, Carrick-Sen D, Newton J, Echevarria C, Stenton C, Jambon M, Gray J, Pearce K, Burns G, De Soyza A. |                                                                                                                             | 2018 | Randomised controlled trial of cognitive behavioural therapy in COPD                                                                                                                                                          | ERJ Open Research 2018: 4(4): 00094-02018.        | Randomised, controlled study                                       |
| Do_supportive care                                                                                                             |                                                                                                                             |      |                                                                                                                                                                                                                               |                                                   |                                                                    |
| Handheld fan                                                                                                                   | Johnson MJ, Booth S, Currow DC, Lam LT, Phillips JL.                                                                        | 2016 | A Mixed-Methods, Randomized, Controlled Feasibility Trial to Inform the Design of a Phase III Trial to Test the Effect of the Handheld Fan on Physical Activity and Carer Anxiety in Patients With Refractory Breathlessness. | J Pain Symptom Manage 2016: 51(5): 807-815.       | Feasibility trial                                                  |
|                                                                                                                                | Barnes-Harris M, Allgar V, Booth S, Currow D, Hart S, Phillips J, Swan F, Johnson MJ.                                       | 2019 | Battery operated fan and chronic breathlessness: does it help?                                                                                                                                                                | BMJ Support Palliat Care 2019: 9(4): 478-481.     | A secondary exploratory analysis of 2 randomised controlled trials |
|                                                                                                                                | Galbraith S, Fagan P, Perkins P, Lynch A, Booth S.                                                                          | 2010 | Does the use of a handheld fan improve chronic dyspnea? A randomized, controlled, crossover trial.                                                                                                                            | J Pain Symptom Manage 2010: 39(5): 831-838.       | Randomised controlled study                                        |
|                                                                                                                                | Marchetti N, Lammi MR, Travaline JM, Ciccolella D, Civic B, Criner GJ.                                                      | 2015 | Air Current Applied to the Face Improves Exercise Performance in Patients with COPD.                                                                                                                                          | Lung 2015: 193(5): 725-731.                       | Crossover study                                                    |
| Nutritional support                                                                                                            | Ferreira IM, Brooks D, White J, Goldstein R.                                                                                | 2012 | Nutritional supplementation for stable chronic obstructive pulmonary disease.                                                                                                                                                 | Cochrane Database of Systematic Reviews 2012(12). | Cochrane review                                                    |
|                                                                                                                                | Collins PF, Elia M, Stratton RJ.                                                                                            | 2013 | Nutritional support and functional capacity in chronic obstructive pulmonary disease: A systematic review and meta - analysis.                                                                                                | Respirology 2013: 18(4): 616-629.                 | Systematic review and meta - analysis                              |
|                                                                                                                                | Jolliffe DA, Greenberg L, Hooper RL, Mathyssen C, Rafiq R, de Jongh RT, Camargo CA, Griffiths CJ, Janssens W, Martineau AR. | 2019 | Vitamin D to prevent exacerbations of COPD: systematic review and meta-analysis of individual participant data from randomised controlled trials.                                                                             | Thorax 2019: 74(4): 337-345.                      | Systematic review and meta-analysis                                |

| Do not_ pharmacological management                                                                                                                            |                                                                                |      |                                                                                                                                                                     |                                                                 |                             |
|---------------------------------------------------------------------------------------------------------------------------------------------------------------|--------------------------------------------------------------------------------|------|---------------------------------------------------------------------------------------------------------------------------------------------------------------------|-----------------------------------------------------------------|-----------------------------|
| SAMA                                                                                                                                                          | Cheyne L, Irvin - Sellers MJ, White J.                                         | 2015 | Tiotropium versus ipratropium bromide for chronic obstructive pulmonary disease.                                                                                    | Cochrane Database of Systematic Reviews 2015(9).                | Cochrane review             |
| Routine use of systemic corticosteroids                                                                                                                       | Walters JAE, Tan DJ, White CJ and Wood - Baker R.                              | 2018 | Different durations of corticosteroid therapy for exacerbations of chronic obstructive pulmonary disease.                                                           | Cochrane Database of Systematic Reviews. 2018.                  | Cochrane review             |
| Nebulised opioids                                                                                                                                             | Barnes H, McDonald J, Smallwood N, Manser R.                                   | 2016 | Opioids for the palliation of refractory breathlessness in adults with advanced disease and terminal illness.                                                       | Cochrane Database of Systematic Reviews 2016(3).                | Cochrane review             |
|                                                                                                                                                               | Ekström M, Nilsson F, Abernethy AA, Currow DC.                                 | 2015 | Effects of Opioids on Breathlessness and Exercise Capacity in Chronic Obstructive Pulmonary Disease. A Systematic Review.                                           | Annals of the American Thoracic Society 2015: 12(7): 1079-1092. | Systematic review           |
| Theophylline                                                                                                                                                  | Wilairat P, Kengkla K, Thayawiwat C, Phlaisaithong P, Somboonmee S, Saokaew S. | 2019 | Clinical outcomes of theophylline use as add-on therapy in patients with chronic obstructive pulmonary disease: A propensity score matching analysis.               | Chronic Respiratory Disease 2019: 16: 1479973118815694.         | Observational study         |
| PDE <sub>4</sub>                                                                                                                                              | Janjua S, Fortescue R, Poole P.                                                | 2020 | Phosphodiesterase - 4 inhibitors for chronic obstructive pulmonary disease.                                                                                         | Cochrane Database of Systematic Reviews 2020(5).                | Cochrane review             |
| Do not_ palliative oxygen                                                                                                                                     |                                                                                |      |                                                                                                                                                                     |                                                                 |                             |
| Abernethy AP, McDonald CF, Frith PA, Clark K, Herndon JE, II, Marcello J, Young IH, Bull J, Wilcock A, Booth S, Wheeler JL, Tulsy JA, Crockett AJ, Currow DC. |                                                                                | 2010 | Effect of palliative oxygen versus room air in relief of breathlessness in patients with refractory dyspnoea: a double-blind, randomised controlled trial.          | The Lancet 2010: 376(9743): 784-793.                            | Randomised controlled study |
| Do not_ PR during hospitalisation                                                                                                                             |                                                                                |      |                                                                                                                                                                     |                                                                 |                             |
| Greening NJ, Williams JEA, Hussain SF, Harvey-Dunstan TC, Bankart MJ, Chaplin EJ, Vincent EE, Chimera R, Morgan MD, Singh SJ, Steiner MC.                     |                                                                                | 2014 | An early rehabilitation intervention to enhance recovery during hospital admission for an exacerbation of chronic respiratory disease: randomised controlled trial. | BMJ 2014: 349: g4315.                                           | Randomised controlled study |

|                                                                                                                                                                      |                                                                    |      |                                                                                                                                                                                                                                               |                                                                                   |                                     |
|----------------------------------------------------------------------------------------------------------------------------------------------------------------------|--------------------------------------------------------------------|------|-----------------------------------------------------------------------------------------------------------------------------------------------------------------------------------------------------------------------------------------------|-----------------------------------------------------------------------------------|-------------------------------------|
| Tang CY, Blackstock FC, Clarence M, Taylor NF.                                                                                                                       |                                                                    | 2012 | Early rehabilitation exercise program for inpatients during an acute exacerbation of chronic obstructive pulmonary disease: a randomized controlled trial.                                                                                    | J Cardiopulm Rehabil Prev 2012; 32(3): 163-169.                                   | Randomised controlled study         |
| Do not_telehealth                                                                                                                                                    |                                                                    |      |                                                                                                                                                                                                                                               |                                                                                   |                                     |
| Gregersen TL, Green A, Frausing E, Ringbæk T, Brøndum E, Suppli Ulrik C.                                                                                             |                                                                    | 2016 | Do telemedical interventions improve quality of life in patients with COPD? A systematic review.                                                                                                                                              | International journal of chronic obstructive pulmonary disease 2016; 11: 809-822. | Systematic review                   |
| McLean S, Nurmatov U, Liu JLY, Pagliari C, Car J, Sheikh A.                                                                                                          |                                                                    | 2011 | Telehealthcare for chronic obstructive pulmonary disease.                                                                                                                                                                                     | Cochrane Database of Systematic Reviews 2011(7).                                  | Cochrane review                     |
| Cartwright M, Hirani SP, Rixon L, Beynon M, Doll H, Bower P, Bardsley M, Steventon A, Knapp M, Henderson C, Rogers A, Sanders C, Fitzpatrick R, Barlow J, Newman SP. |                                                                    | 2013 | Effect of telehealth on quality of life and psychological outcomes over 12 months (Whole Systems Demonstrator telehealth questionnaire study): nested study of patient reported outcomes in a pragmatic, cluster randomised controlled trial. | BMJ 2013; 346: f653.                                                              | Randomised controlled study         |
| Don't know_pharmacological management                                                                                                                                |                                                                    |      |                                                                                                                                                                                                                                               |                                                                                   |                                     |
| SABA                                                                                                                                                                 | Wilkinson M, Bulloch B, Garcia-Filion P and Keahey L               | 2011 | Efficacy of racemic albuterol versus levalbuterol used as a continuous nebulization for the treatment of acute asthma exacerbations: a randomized, double-blind, clinical trial                                                               | Journal of Asthma. 2011; 48: 188-93.                                              | Randomised controlled study         |
|                                                                                                                                                                      | Jat KR, Khairwa A                                                  | 2013 | Levalbuterol versus albuterol for acute asthma: A systematic review and meta-analysis                                                                                                                                                         | Pulmonary Pharmacology & Therapeutics. 2013; 26: 239-48.                          | Systematic review and meta analysis |
|                                                                                                                                                                      | Brunetti L, Poiani G, Dhanaliwala F, Poppiti K, Kang H and Suh D-C | 2015 | Clinical outcomes and treatment cost comparison of levalbuterol versus albuterol in hospitalized adults with chronic obstructive pulmonary disease or asthma                                                                                  | American Journal of Health-System Pharmacy. 2015; 72: 1026-35.                    | Randomised controlled study         |
| ICS                                                                                                                                                                  | Yang IA, Clarke MS, Sim EHA, Fong KM.                              | 2012 | Inhaled corticosteroids for stable chronic obstructive pulmonary disease                                                                                                                                                                      | Cochrane Database of Systematic Reviews 2012(7).                                  | Cochrane review                     |

|                                |                                                                                                                       |      |                                                                                                                                                                                    |                                                                           |                                     |
|--------------------------------|-----------------------------------------------------------------------------------------------------------------------|------|------------------------------------------------------------------------------------------------------------------------------------------------------------------------------------|---------------------------------------------------------------------------|-------------------------------------|
|                                | Vestbo J, Anderson JA, Brook RD, Calverley PM, Celli BR, Crim C, Martinez F, Yates J, Newby DE, SUMMIT Investigators. | 2016 | Fluticasone furoate and vilanterol and survival in chronic obstructive pulmonary disease with heightened cardiovascular risk (SUMMIT): a double-blind randomised controlled trial. | The Lancet 2016: 387(10030): 1817-1826.                                   | Randomised controlled study         |
| Antidepressants                | Pollok J, van Agteren JEM, Carson - Chahhoud KV.                                                                      | 2018 | Pharmacological interventions for the treatment of depression in chronic obstructive pulmonary disease.                                                                            | Cochrane Database of Systematic Reviews 2018(12).                         | Cochrane review                     |
| Benzodiazepines                | Simon ST, Higginson IJ, Booth S, Harding R, Weingärtner V, Bausewein C.                                               | 2016 | Benzodiazepines for the relief of breathlessness in advanced malignant and non - malignant diseases in adults.                                                                     | Cochrane Database of Systematic Reviews 2016(10).                         | Cochrane review                     |
|                                | Ekström MP, Bornefalk-Hermansson A, Abernethy AP, Currow DC.                                                          | 2014 | Safety of benzodiazepines and opioids in very severe respiratory disease: national prospective study.                                                                              | BMJ 2014: 348: g445.                                                      | Cohort study                        |
| Routine use of mucolytics      | Poole P, Sathananthan K, Fortescue R.                                                                                 | 2019 | Mucolytic agents versus placebo for chronic bronchitis or chronic obstructive pulmonary disease.                                                                                   | Cochrane Database of Systematic Reviews 2019(5).                          | Cochrane review                     |
| Don't know_relaxation          |                                                                                                                       |      |                                                                                                                                                                                    |                                                                           |                                     |
|                                | Volpato E, Banfi P, Rogers SM, Pagnini F.                                                                             | 2015 | Relaxation Techniques for People with Chronic Obstructive Pulmonary Disease: A Systematic Review and a Meta-Analysis.                                                              | Evidence-Based Complementary and Alternative Medicine 2015: 2015: 628365. | Systematic review and meta-analysis |
|                                | Volpato E, Banfi P, Nicolini A, Pagnini F.                                                                            | 2018 | A quick relaxation exercise for people with chronic obstructive pulmonary disease: explorative randomized controlled trial.                                                        | Multidisciplinary Respiratory Medicine 2018: 13(1): 13.                   | Randomised controlled study         |
| Don't know_breathing exercises |                                                                                                                       |      |                                                                                                                                                                                    |                                                                           |                                     |
|                                | Holland AE, Hill CJ, Jones AY, McDonald CF.                                                                           | 2012 | Breathing exercises for chronic obstructive pulmonary disease                                                                                                                      | Cochrane Database of Systematic Reviews 2012(10).                         | Cochrane review                     |

|                                                                                        |      |                                                                                                                                                                                                        |                                          |                                     |
|----------------------------------------------------------------------------------------|------|--------------------------------------------------------------------------------------------------------------------------------------------------------------------------------------------------------|------------------------------------------|-------------------------------------|
| Ubolnuar N, Tantisuwat A, Thaveeratitham P, Lertmaharit S, Kruapanich C, Mathiyakom W. | 2019 | Effects of Breathing Exercises in Patients With Chronic Obstructive Pulmonary Disease: Systematic Review and Meta-Analysis.                                                                            | Ann Rehabil Med 2019: 43(4): 509-523.    | Systematic review and meta-analysis |
| Borge CR, Hagen KB, Mengshoel AM, Omenaas E, Moum T, Wahl AK.                          | 2014 | Effects of controlled breathing exercises and respiratory muscle training in people with chronic obstructive pulmonary disease: results from evaluating the quality of evidence in systematic reviews. | BMC Pulmonary Medicine 2014: 14(1): 184. | Systematic review                   |
